# Supplementary material for: Examining the link between social emotion regulation and relationship satisfaction at dyad and individual levels of analysis
Source: Research Square preprint supplement (doi:10.21203/rs.3.rs-9510392/v1), 2026-05-27
Supplement: Supplementary file 1 [file 5d2eea139514ff2bda94756e.docx]

**Examining the link between social emotion regulation and relationship satisfaction at dyad and individual levels of analysis**

Affective Science

Mayra Kalaora1,2, Niall Bolger1, Kevin N. Ochsner1, Zhouzhou He1

1 Department of Psychology, Columbia University, New York, NY, USA

2 Department of Biology, Columbia University, New York, NY, USA

Corresponding author: Mayra Kalaora ([mayra.kalaora@columbia.edu](mailto:mayra.kalaora@columbia.edu))

**Online Resource 1 can be found on the following page.**

**Online Resource 1** Relationship Satisfaction scores were negatively skewed

**
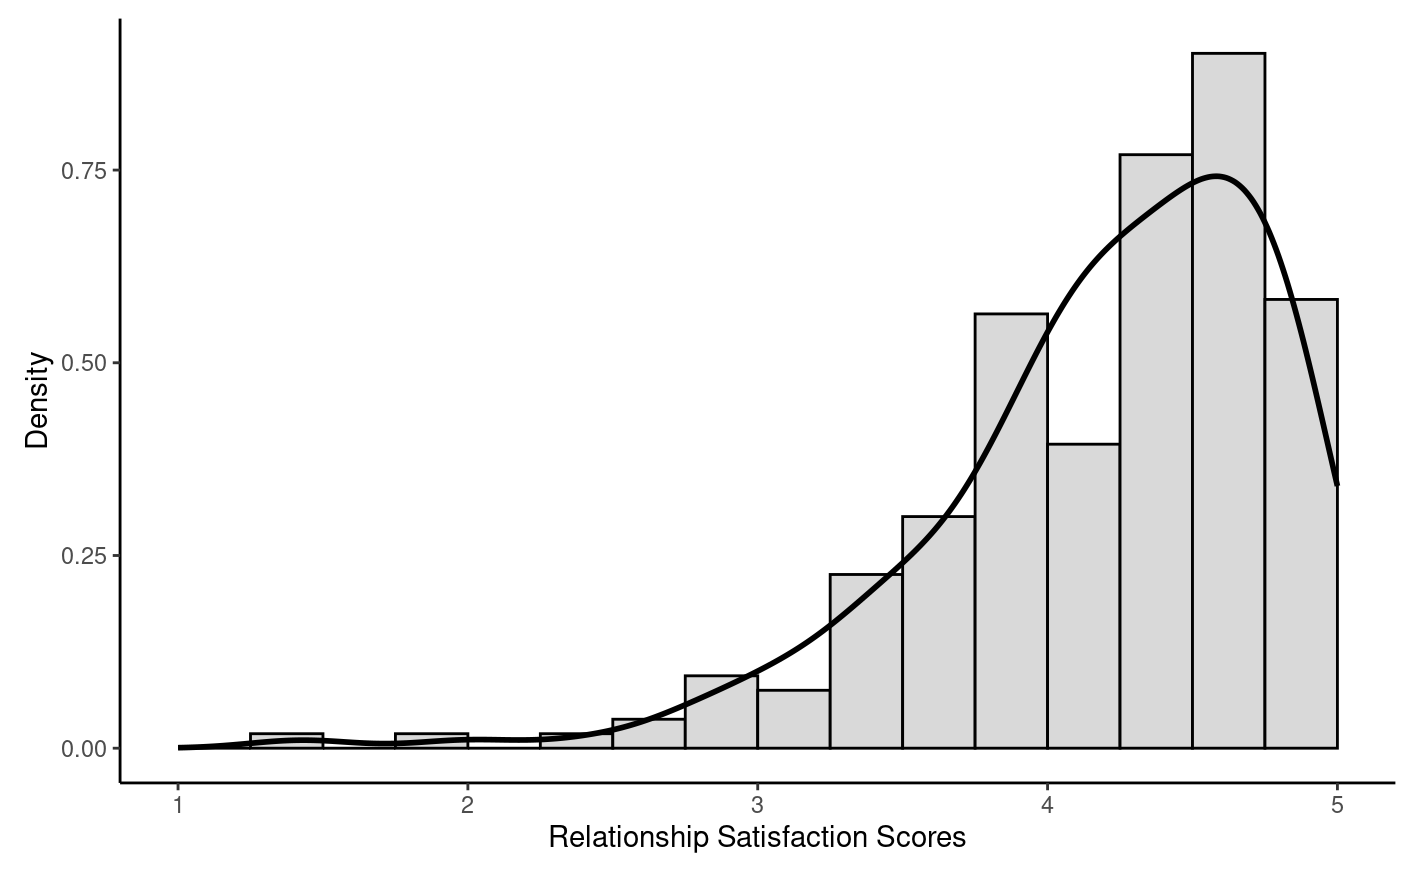
**
